# Supplementary material for: The Teacher Self-Efficacy Scale (TSES) Factorial Structure Evidence Review and New Evidence From Polish-Speaking Samples
Source: Atypon-hosted journal article supplement (doi:10.1027/1015-5759/a000475), 2018-06-15
Supplement: 1015-5759_a000475_esm3.pdf [file 1015-5759_a000475_esm3.pdf]

Along with this description anonymised datasets are provided with results of TSES administration among primary (2,083) and lower-secondary school teachers (2,382) in Poland.

Use of data is permissible only for non-commercial, academic purposes. If you wish to publish based on this data, it is permissible only upon written request and explicit written approval of the author (Maciej Koniewski).

If you wish to obtain dataset with results of TSES administration among US teachers used in this article please contact directly Megan Tschannen-Moran.

Datasets are ready-to-use Mplus \*.dat files and include the following variables:

**TSES\_PL\_GIM.dat** (lower-secondary school teachers data)

|                |                                         |
|----------------|-----------------------------------------|
| schoolid       | School ID                               |
| idteach        | Teacher ID                              |
| w_szkola       | School weight                           |
| sex            | Teacher's sex                           |
| born           | Teacher's year of birth                 |
| tenure         | Number of years as teacher              |
| TSES1 - TSES24 |                                         |
| biol           | Subject taught: Biology                 |
| chemia         | Subject taught: Chemistry               |
| fizyka         | Subject taught: Physics and astronomy   |
| geogr          | Subject taught: Geography               |
| hist           | Subject taught: History                 |
| infor          | Subject taught: IT/ICT                  |
| jezobcy        | Subject taught: Foreign language        |
| jezpol         | Subject taught: Polish language         |
| mat            | Subject taught: Mathematics             |
| relig          | Subject taught: Religious education     |
| etyk           | Subject taught: Ethics                  |
| sztu           | Subject taught: Art                     |
| tech           | Subject taught: Technology              |
| wos            | Subject taught: Knowledge about society |
| wf             | Subject taught: PE                      |
| inne           | Subject taught: Other                   |

**TSES\_PL\_SP.dat** (primary school teachers data)

|                |                                     |
|----------------|-------------------------------------|
| schoolid       | School ID                           |
| idteach        | Teacher ID                          |
| w_szkola       | School weight                       |
| sex            | Teacher's sex                       |
| born           | Teacher's year of birth             |
| tenure         | Number of years as teacher          |
| TSES1 - TSES24 |                                     |
| zintegr        | Subject taught: Integrated learning |
| przyr          | Subject taught: Science             |
| hist           | Subject taught: History and society |
| infor          | Subject taught: IT/ICT              |
| jezobcy        | Subject taught: Foreign language    |
| jezpol         | Subject taught: Polish language     |
| mat            | Subject taught: Mathematics         |
| relig          | Subject taught: Religious education |
| etyk           | Subject taught: Ethics              |
| muz            | Subject taught: Music               |
| plast          | Subject taught: Visual art          |

|      |                            |
|------|----------------------------|
| wf   | Subject taught: PE         |
| tech | Subject taught: Technology |
| inne | Subject taught: Other      |

**TSES\_PL\_appended.dat** (appended samples, file use for measurement invariance testing)

|                |                            |
|----------------|----------------------------|
| schoolid       | School ID                  |
| idteach        | Teacher ID                 |
| w_szkola       | School weight              |
| sex            | Teacher's sex              |
| born           | Teacher's year of birth    |
| tenure         | Number of years as teacher |
| TSES1 - TSES24 |                            |
| source         | (1=GIM, 2=SP)              |
